# Supplementary material for: Antithrombotic functions of small molecule-capped gold nanoparticles
Source: Royal Society of Chemistry journal article supplement (doi:10.1039/c4nr01937g), 2014-06-26
Supplement: c4nr01937g1.pdf [file c4nr01937g1.pdf]

Supporting Information

## Antithrombotic functions of small molecule-capped gold nanoparticles

Yue Tian,<sup>a,b</sup> Yuyun Zhao,<sup>a</sup> Wenfu Zheng,<sup>a</sup> Wei Zhang,<sup>\*a</sup> and Xingyu Jiang<sup>\*a</sup>

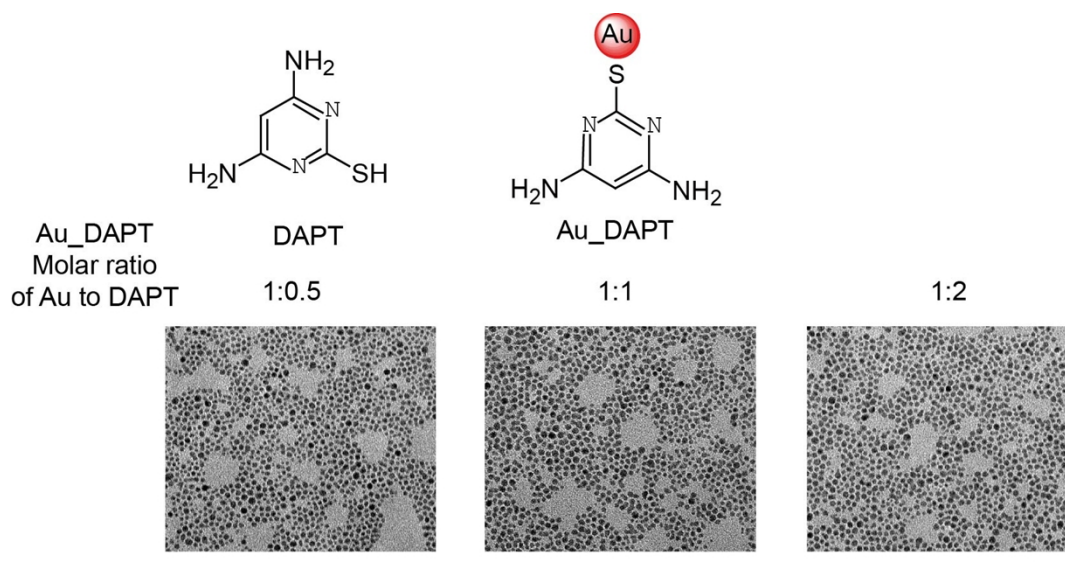

Figure S1. Structure of DAPT and Au\_DAPT, and TEM characterization of Au\_DAPT with different mole ratio of HAuCl<sub>4</sub> and DAPT (1:0.5, 1:1, and 1:2). Scale bar, 20 nm.

Table S1. Components of Au\_DAPT.

|                 | Molar ratio of DAPT to Au in NPs calculated by XPS | Diameter of NPs (nm) | Au atoms per NP | DAPTs per NP |
|-----------------|----------------------------------------------------|----------------------|-----------------|--------------|
| Au_DAPT (1:0.5) | 0.50:1                                             | 3.27 ± 0.49          | 1083            | 542          |
| Au_DAPT (1:1)   | 0.52:1                                             | 3.30 ± 0.52          | 1114            | 579          |
| Au_DAPT (1:2)   | 0.51:1                                             | 3.31 ± 0.37          | 1123            | 573          |

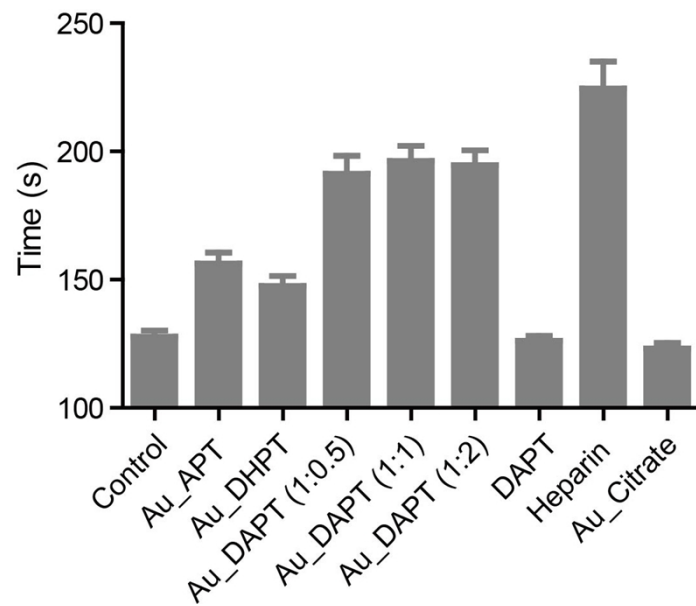

Figure S2. Clotting time of Au\_DAPT *in vivo*. The concentration of Au NPs is 600  $\mu\text{g/kg}$ . The concentration of DAPT 1  $\text{mg/kg}$ . The concentration of heparin is 500  $\mu\text{g/kg}$ . Values are presented as mean $\pm$ S.E.M. (n=8-10).

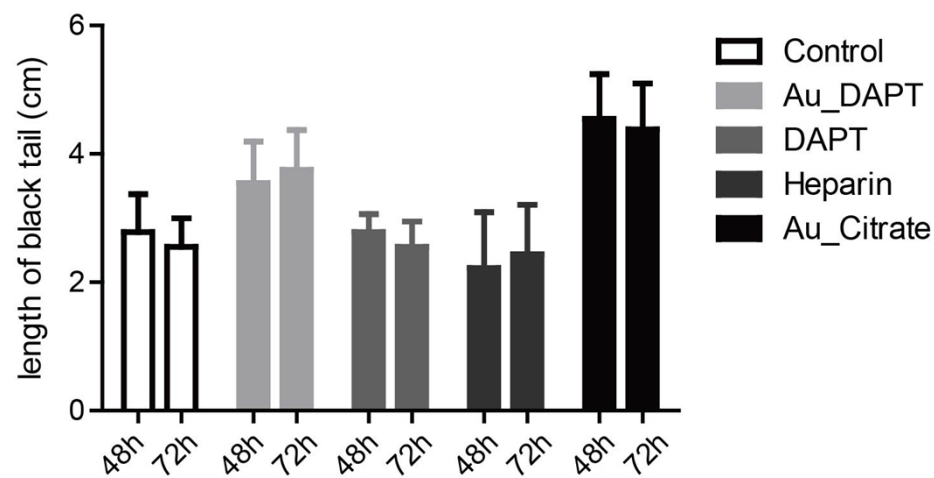

Figure S3. Effect of Au\_DAPT on tail thrombosis induced by carrageenan in mice within 48 h and 72 h. Values are presented as mean $\pm$ S.E.M. (n=8-10).

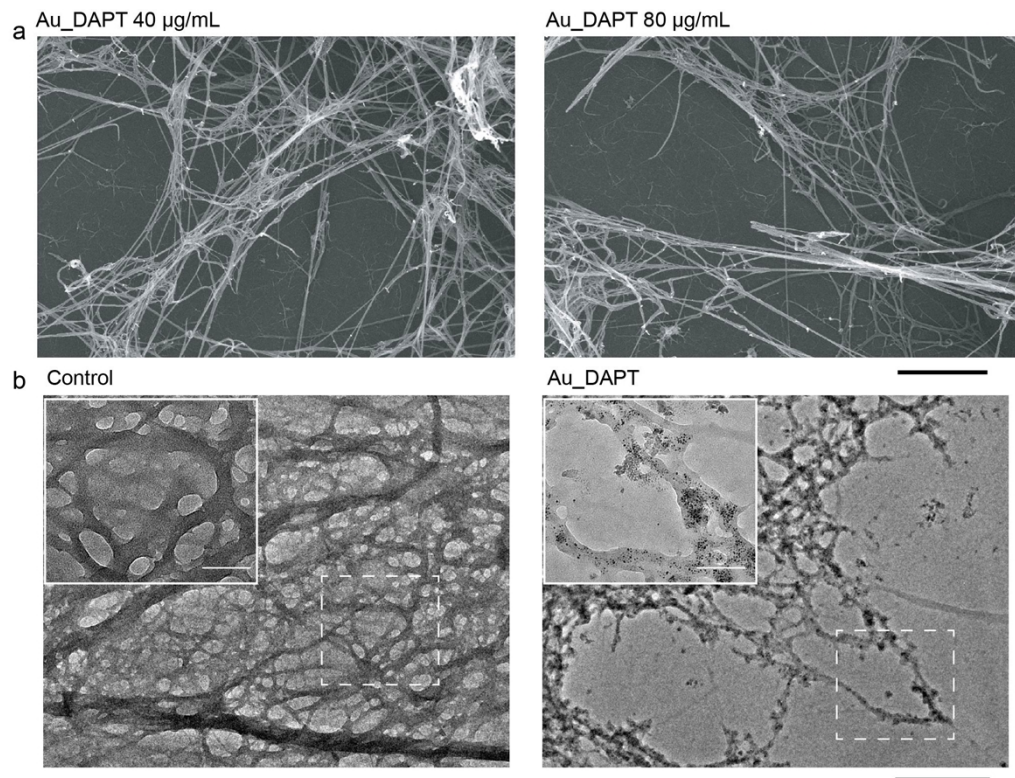

Figure S4. Effects of Au\_DAPT on fibrin polymerization and fibrin structure. (a) SEM characterization of clot made with purified fibrinogen with 40 and 80 µg/mL Au\_DAPT. Scale bar = 2 µm. (b) TEM characterization of fibrin structure with or without Au\_DAPT. Scale bar = 0.5 µm. The insets show the details of the fibrin fibers formed with or without Au\_DAPT. Scale bar = 100 nm.
